# Supplementary material for: Prognostic impact of blood pressure response plus gadolinium enhancement in dilated cardiomyopathy
Source: HighWire-hosted journal article supplement (doi:10.1136/heartjnl-2014-307007), 2015-03-11
Supplement: heartjnl-2014-307007supp.pdf [file heartjnl-2014-307007supp.pdf]

## Supplementary data

**Supplemental Table 1. Incidence of Cardiac Events and LGE Volume by LGE Pattern**

|                              | LGE-positive       |                 |                   | p Value |
|------------------------------|--------------------|-----------------|-------------------|---------|
|                              | Mid-wall<br>(n=52) | Focal<br>(n=19) | Diffuse<br>(n=34) |         |
| All cardiac events (%)       | 14 (27)            | 5 (26)          | 12 (35)           | 0.672   |
| Cardiac death (%)            | 2 (4)              | 0               | 2 (6)             | 0.355   |
| Cardiac transplantation (%)  | 0                  | 0               | 1 (3)             | 0.301   |
| LVAD implantation (%)        | 1 (2)              | 0               | 0                 | 0.493   |
| ICD discharge for VT/Vf (%)  | 2 (4)              | 1 (5)           | 2 (6)             | 0.956   |
| Rehospitalization for HF (%) | 9 (17)             | 4 (21)          | 7 (21)            | 0.876   |
| LGE volume. % of LV mass     | 10 ± 5             | 12 ± 4          | 19 ± 6            | 0.081   |

Data expressed as numbers (%). HF, heart failure; ICD, implantable cardioverter-defibrillator; LGE, late gadolinium enhancement; LV, left ventricle; LVAD, left ventricular assist device; Vf, ventricular fibrillation; VT, ventricular tachycardia.

We quantified LGE volume using the signal threshold versus reference myocardium technique with semi-automatic software (Ziostation 2, Ziosoft, Tokyo, Japan) (Ref 16). LGE volume was defined as areas with signal intensity >2 standard deviations (SD) above the mean signal intensity of the remote reference myocardium and expressed as percentage of LV mass (*JACC Cardiovasc Imaging*. 2013;6:944-54).

When we categorized LGE-positive patients as having a mid-wall (n=52), focal (n=19), or diffuse LGE pattern (n=34) and compared their long-term prognosis and LGE volume (% of LV mass), there were no significant differences in the all cardiac events rate and LGE volume among the three LGE patterns (p=0.672 and p=0.081, respectively).

**Supplemental Table 2. Multivariable Cox model selected by a stepwise method with continuous SBPR, factors that were significant in the univariable analysis, and established risk factors for prognosis (age, gender, NYHA functional class, peak VO<sub>2</sub>, VE/VCO<sub>2</sub> slope)**

|                                             | <b>Multivariable Analysis</b> |               |                |
|---------------------------------------------|-------------------------------|---------------|----------------|
|                                             | <b>HR</b>                     | <b>95% CI</b> | <b>p Value</b> |
| History of VT/Vf                            | 2.70                          | 0.85 – 3.70   | 0.053          |
| QTc interval (per 10 ms increment)          | 1.03                          | 0.97 – 1.11   | 0.356          |
| LVEDVI (per 10 ml/m <sup>2</sup> increment) | 1.07                          | 1.02 – 1.11   | 0.004          |
| Presence of LGE                             | 1.72                          | 0.85 – 3.70   | 0.132          |
| SBPR (per 1 mm Hg decrement)                | 1.13                          | 1.04 – 1.49   | 0.020          |

CI, confidence interval; HR, hazard ratio; LGE, late gadolinium enhancement; LVEDVI, left ventricular end-diastolic volume index; NYHA, New York Heart Association; peak VO<sub>2</sub>, peak oxygen uptake; SBPR, systolic blood pressure response; VE/VCO<sub>2</sub> slope, regression slope relating minute ventilation to carbon dioxide output; Vf, ventricular fibrillation; VT, ventricular tachycardia.

Supplemental Figure 1. Distribution of LGE patterns in LGE-positive groups

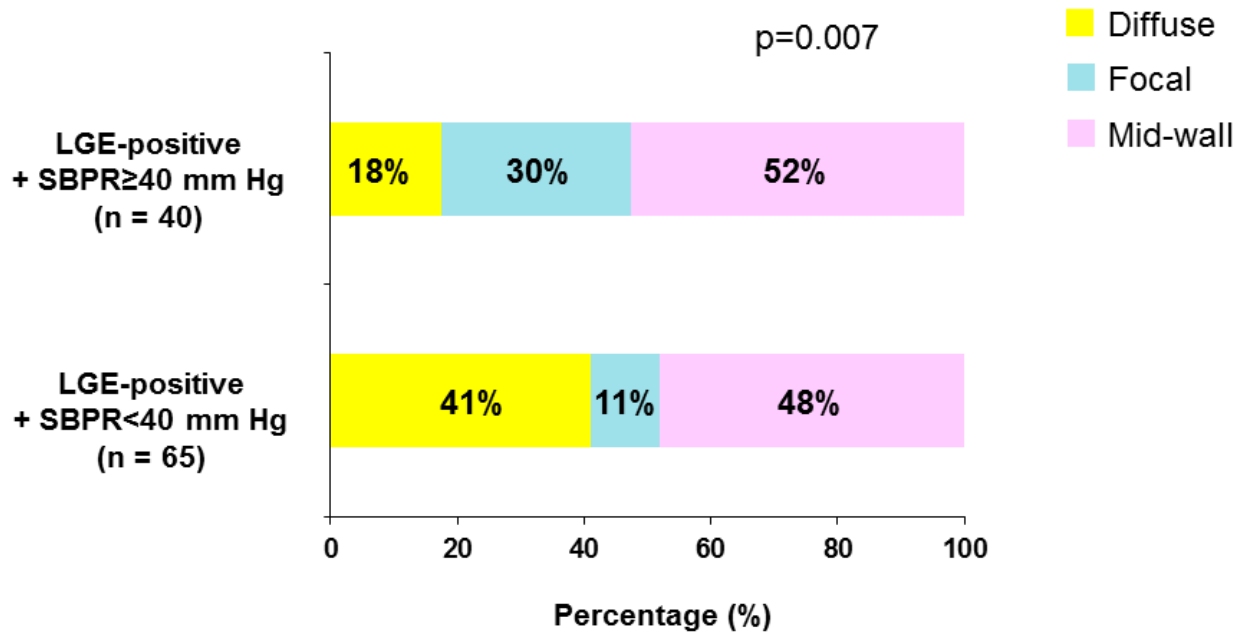

LGE, late gadolinium enhancement; SBPR, systolic blood pressure response.

Supplemental Figure 2. Kaplan-Meier Curves Comparing the Probability of All Cardiac Events According to the Number of Risk Factors (LGE-positive status and SBPR <40 mm Hg) Present When the Two Intermediate Groups were Merged

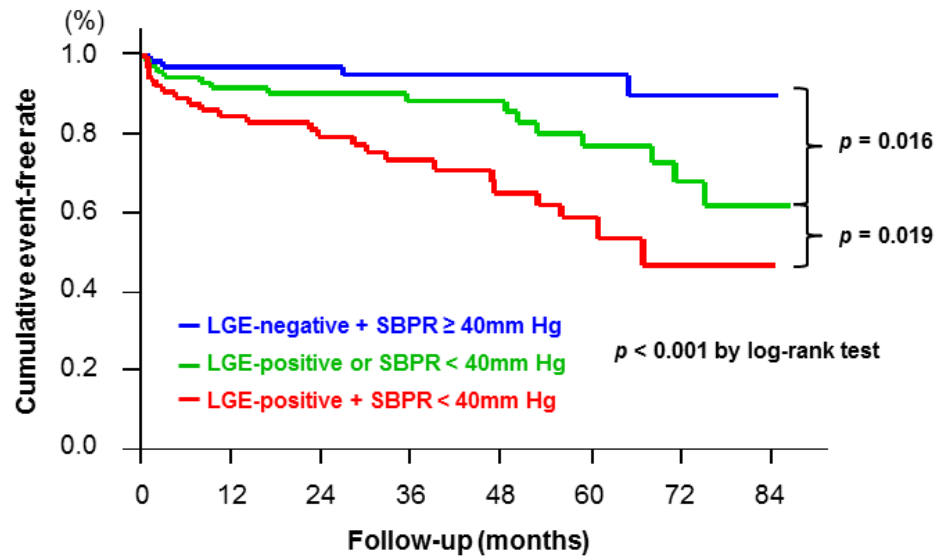

**No. at risk**

|                                    | 0  | 12 | 24 | 36 | 48 | 60 | 72 | 84 |
|------------------------------------|----|----|----|----|----|----|----|----|
| LGE-negative + SBPR $\geq$ 40mm Hg | 69 | 68 |    | 45 |    | 21 |    | 6  |
| LGE-positive or SBPR < 40mm Hg     | 73 | 69 |    | 48 |    | 24 |    | 5  |
| LGE-positive + SBPR < 40mm Hg      | 65 | 56 |    | 32 |    | 14 |    | 3  |

Abbreviations as in Supplemental Figure 1.

## Supplementa Figure Legends

### **Supplemental Figure 1. Distribution of LGE patterns in LGE-positive groups**

The prevalence of a diffuse LGE pattern was significantly higher in patients with a systolic blood pressure response (SBPR) <40 mmHg than those with ≥40 mmHg (41% versus 18%,  $p=0.007$ ).

### **Supplemental Figure 2. Kaplan-Meier Curves Comparing the Probability of All Cardiac Events According to the Number of Risk Factors (LGE-positive status and SBPR <40 mm Hg) Present When the Two Intermediate Groups were Merged**

The all cardiac event-free survival rate was lowest in the LGE-positive + SBPR<40 mm Hg group (both risk factors present) and highest in the LGE-negative + SBPR≥40 mm Hg group (neither risk factor present). Importantly, the rate in LGE-negative + SBPR<40 mm Hg or LGE-positive + SBPR≥40 mm Hg group (one risk factor present) was intermediate.
